# Supplementary material for: Improving Runoff Simulation in the Western United States with Noah-MP and VIC
Source: Copernicus journal article supplement (doi:10.5194/egusphere-2023-2164), 2023-09-28
Supplement: Supplementary file 1 [file egusphere-2023-2164-supplement.pdf]

## Supplement of “Improving Runoff Simulation in the Western United States with Noah-MP and VIC”

Lu Su, Dennis P. Lettenmaier, Ming Pan, Benjamin Bass

Table S1. Features considered for regionalization of calibrated parameters to ungauged basins in VIC and Noah-MP models.

| Features in order of rank for VIC              | Features in order of rank for Noah-MP          |
|------------------------------------------------|------------------------------------------------|
| Longitude Centroid                             | Latitude Centroid                              |
| Latitude Centroid                              | Longitude Centroid                             |
| Max Elevation                                  | Area                                           |
| Precipitation Fall Mean                        | <b>KGE stops increasing for below features</b> |
| Temperature Fall Mean                          | Temperature Summer Mean                        |
| <b>KGE stops increasing for below features</b> | Min Elevation                                  |
| Mean Elevation                                 | Precipitation Annual Mean                      |
| Min Elevation                                  | Precipitation Fall Mean                        |
| Temperature Summer Mean                        | Perimeter                                      |
| Precipitation Spring Mean                      | Temperature Spring Mean                        |
| Precipitation Winter Mean                      | Max Elevation                                  |
| Precipitation Summer Mean                      | Precipitation Winter Mean                      |
| Precipitation Annual Mean                      | Temperature Winter Mean                        |
| Mean Annual Max 1-D Precipitation              | Temperature Annual Mean                        |
| Temperature Winter Mean                        | Precipitation Spring Mean                      |
| Temperature Spring Mean                        | Precipitation Summer Mean                      |
| Temperature Annual Mean                        | Mean Elevation                                 |
| Perimeter                                      | Temperature Fall Mean                          |
| Area                                           | Mean Annual Max 1-D Precipitation              |

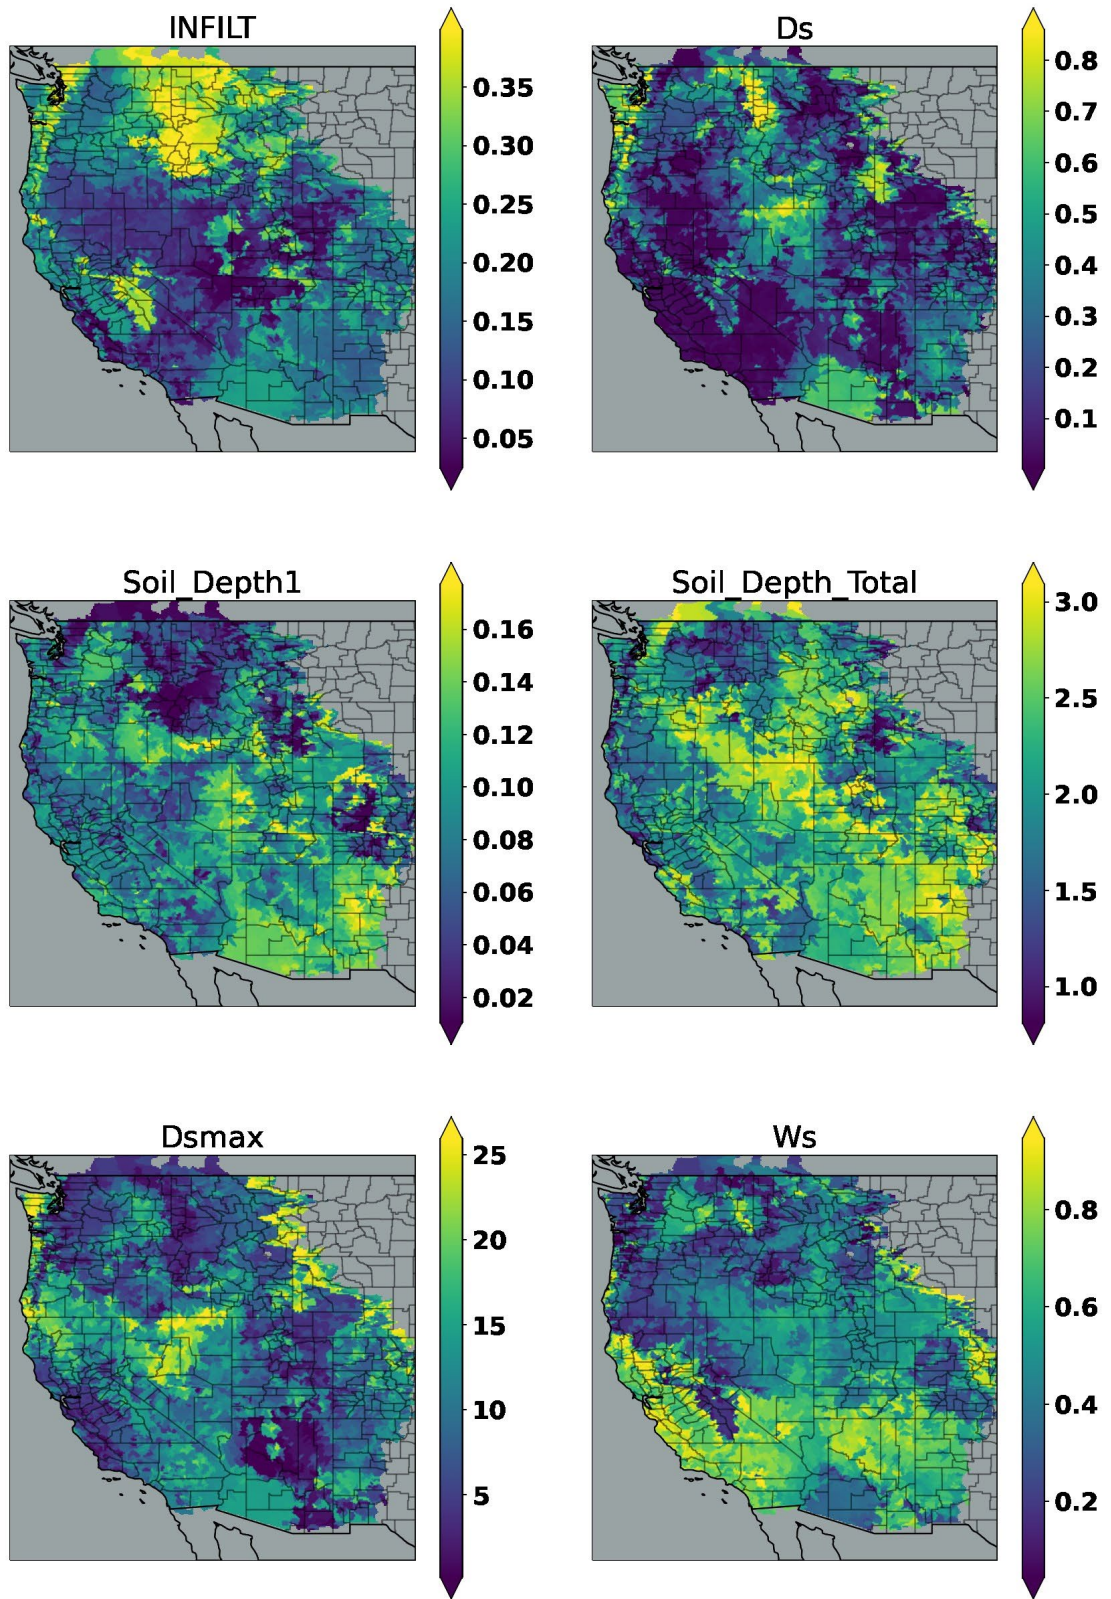

Figure S1. Regionalized VIC land surface parameters over WUS.

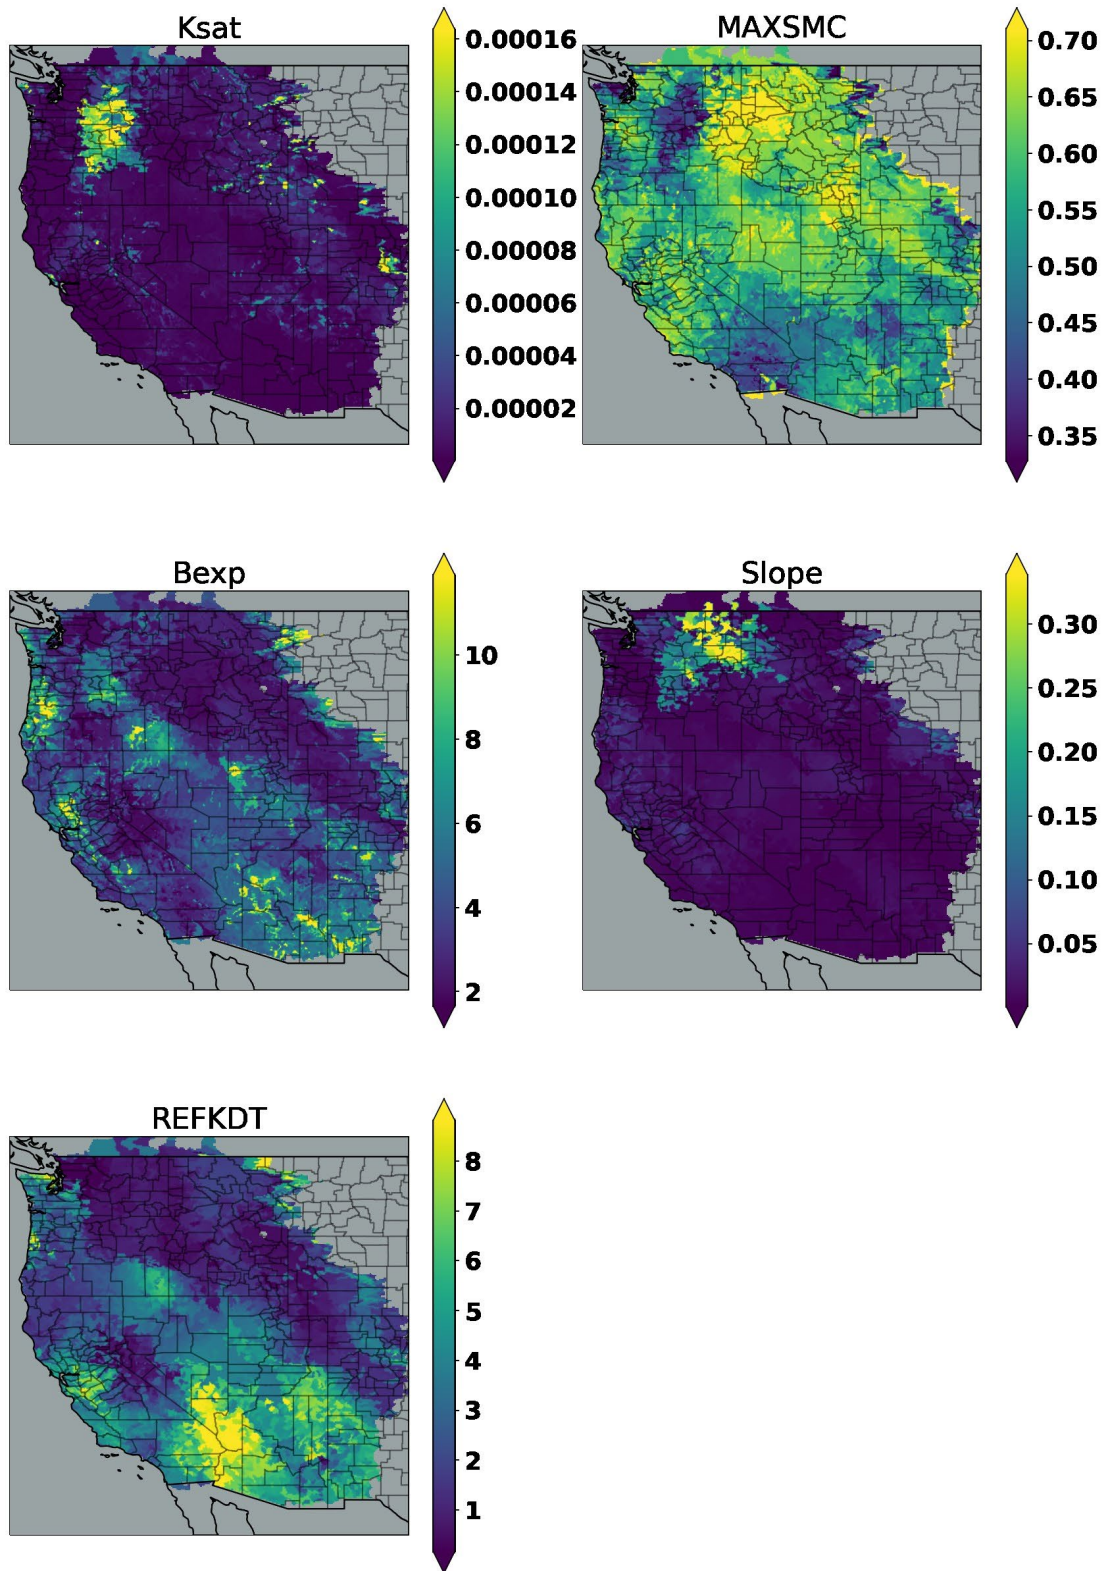

Figure S2. Regionalized Noah-MP land surface parameters over WUS.

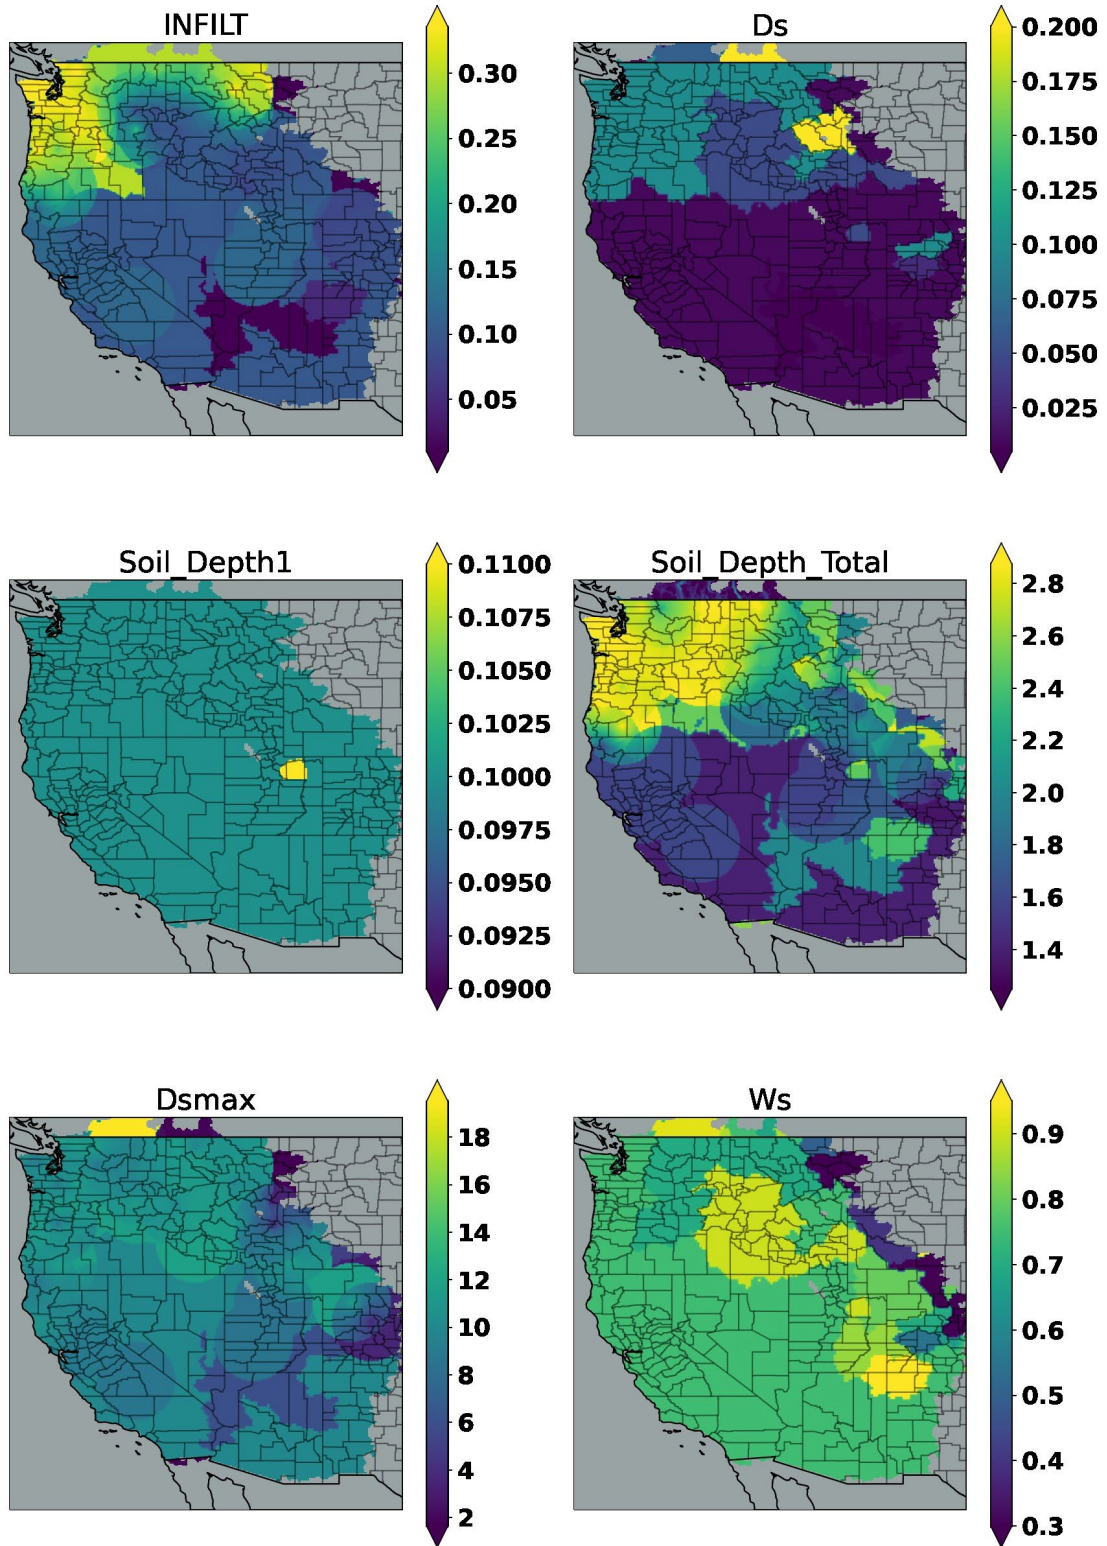

Figure S3. Baseline VIC land surface parameters over WUS.

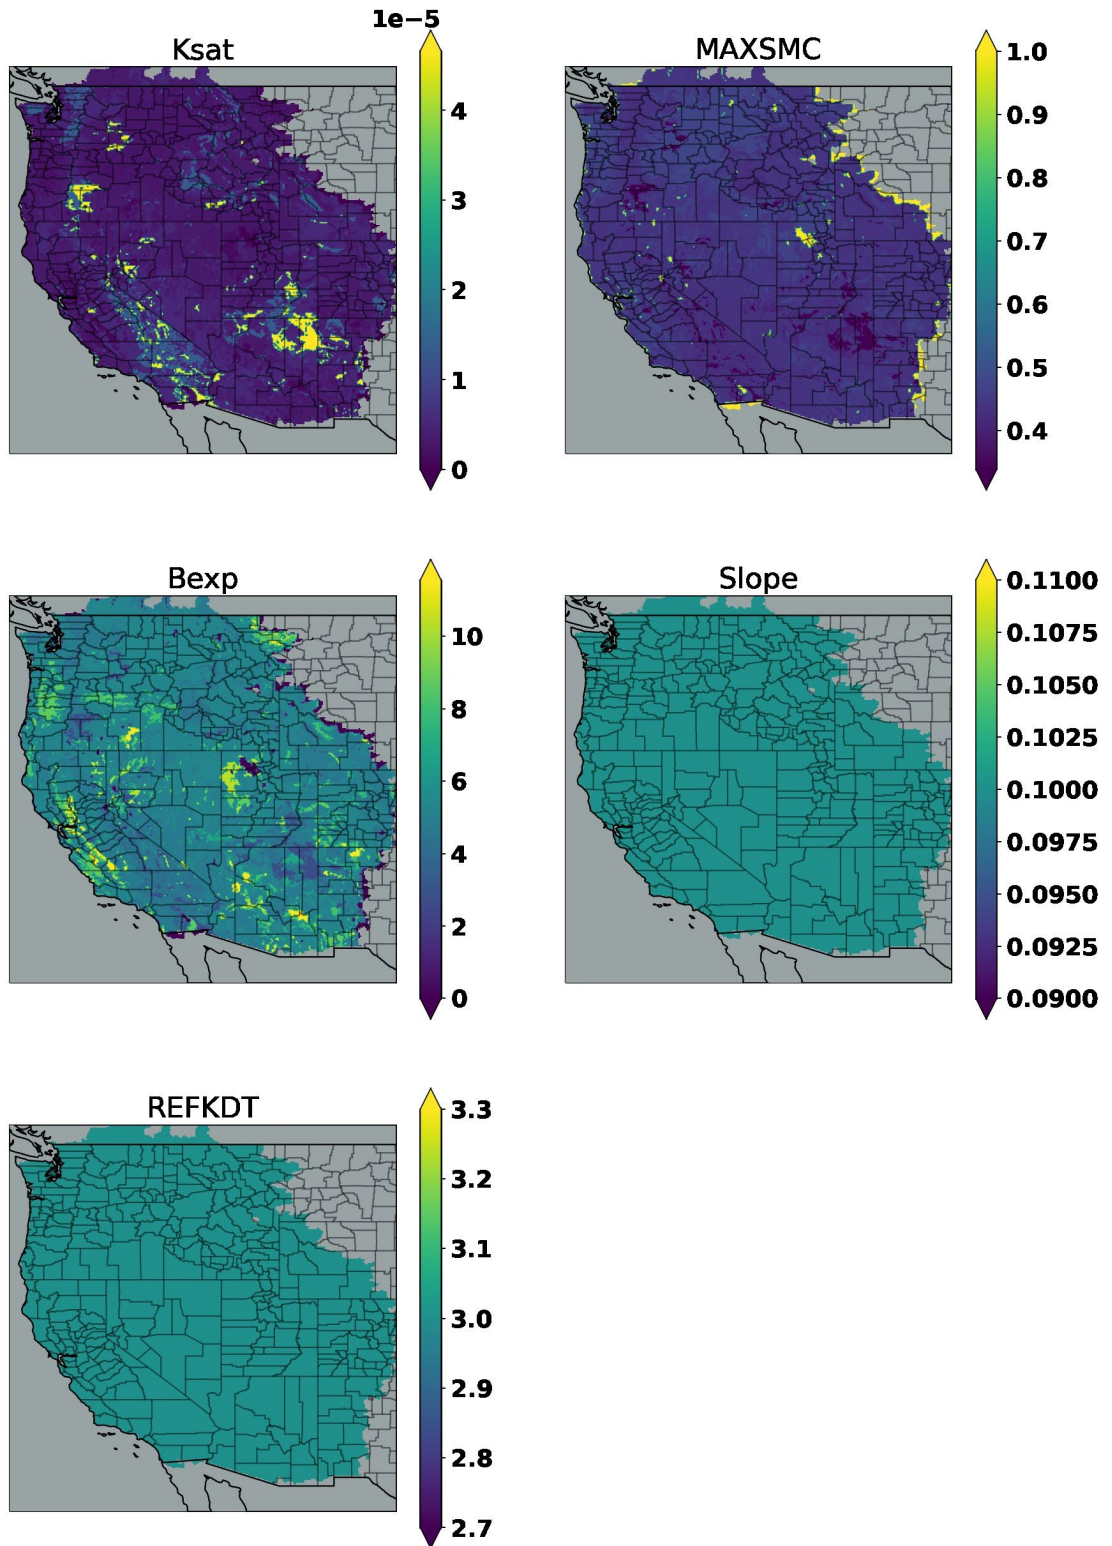

Figure S4. Baseline Noah-MP land surface parameters over WUS.
